# Supplementary material for: Self-assembled large scale metal alloy grid patterns as flexible transparent conductive layers
Source: PubMed Central journal article supplement (PMC4558545; doi:10.1038/srep13710), 2015-09-03
Supplement: srep13710-s1.pdf [file srep13710-s1.pdf]

## Supplementary Information

### Self-assembled large scale metal alloy grid patterns as flexible transparent conductive layers

Melinda Mohl, Aron Dombovari, Robert Vajtai, Pulickel M. Ajayan, Krisztian Kordas

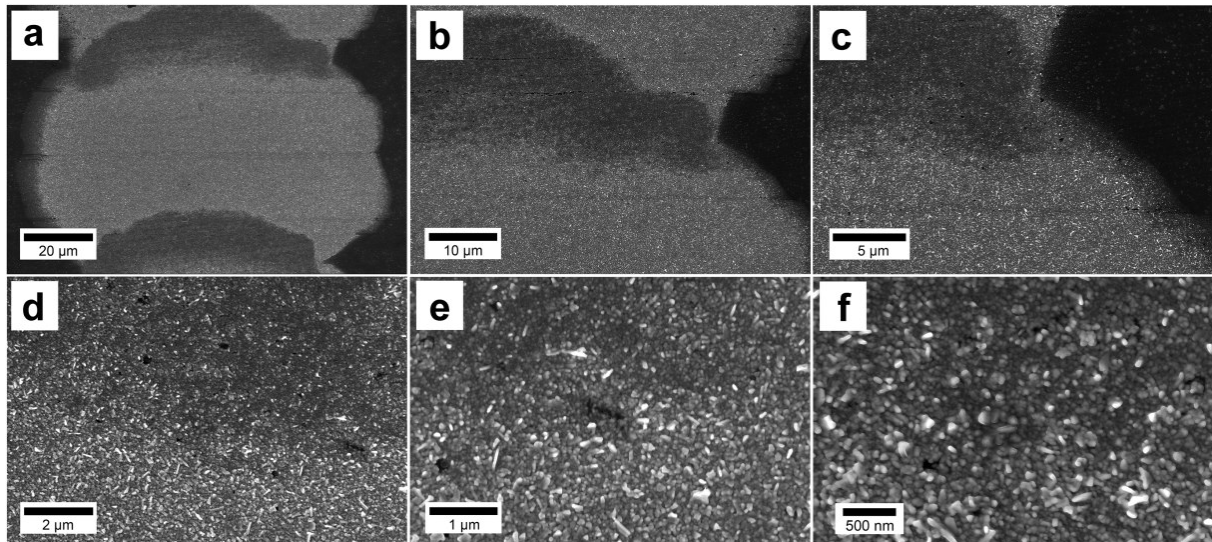

**Figure SI-1** SEM images of PdCu grid patterns on PET in different magnification.

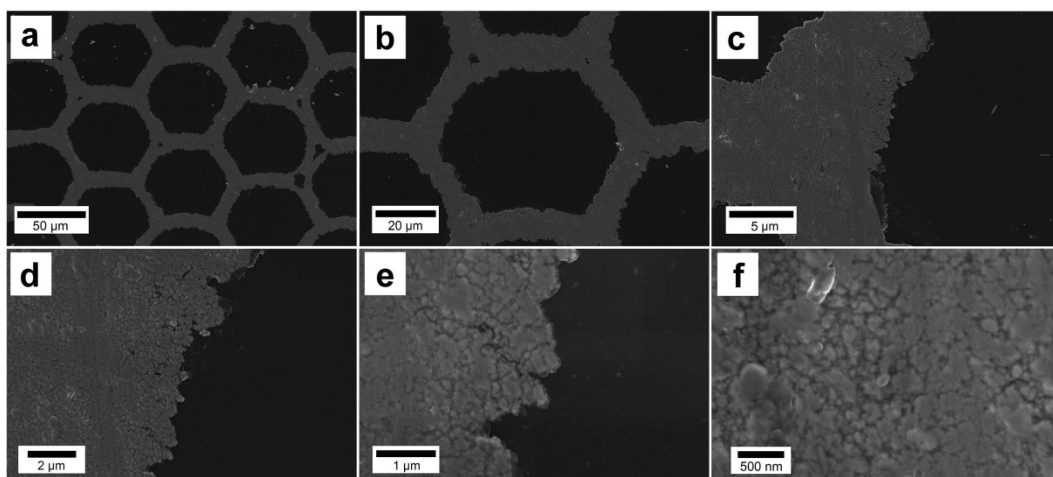

**Figure SI-2** SEM images of AgCu grid patterns on PET in different magnification.

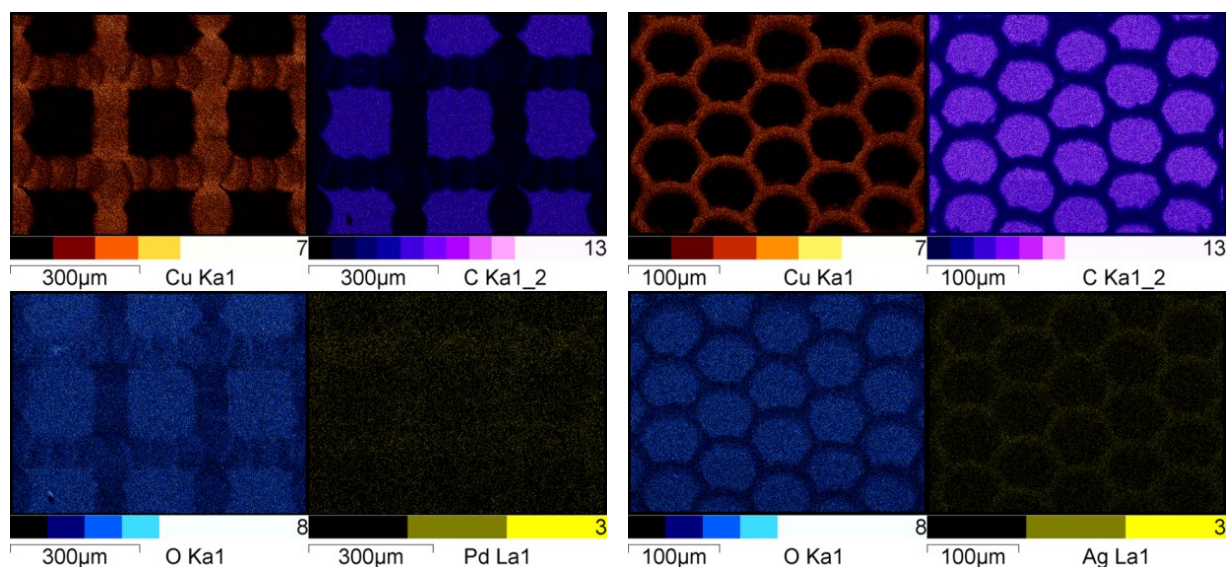

**Figure SI-3** EDX maps of PdCu and AgCu patterns on PET.

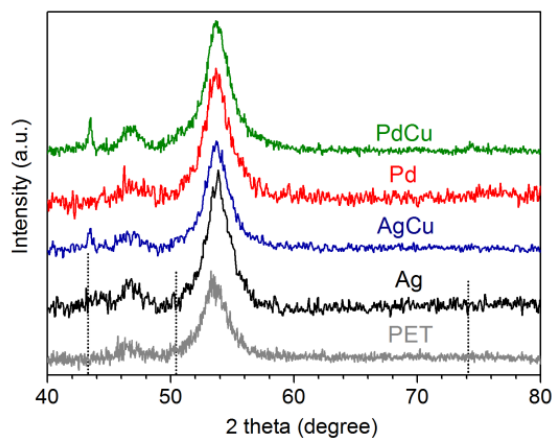

**Figure SI-4** XRD patterns of PET, printed seeds (Ag and Pd), and copper plated patterns (AgCu and PdCu) on PET. Dotted black lines indicate the most intense reflections of copper (ICDD card No. 04-0836) at 43.295, 50.431, and 74.127 2 theta degree.

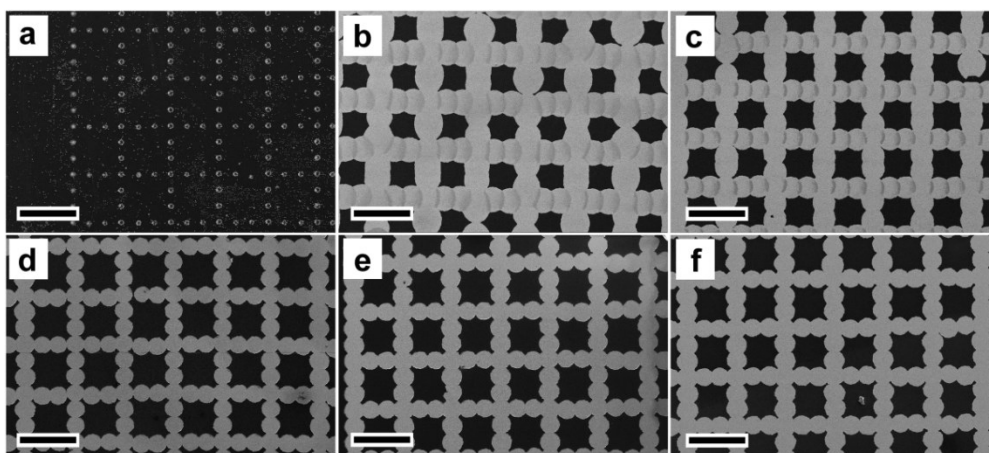

**Figure SI-5** SEM images of PdCu grid patterns on PET (a) without plasma treatment, and after plasma treatment treatment: (b) 0 day, (c) 1 day, (d) 7 days. Printing 7 days after plasma treatment with copper plating 1 day after (e), and 2 days after printing (f). Scale bar 200  $\mu\text{m}$ .

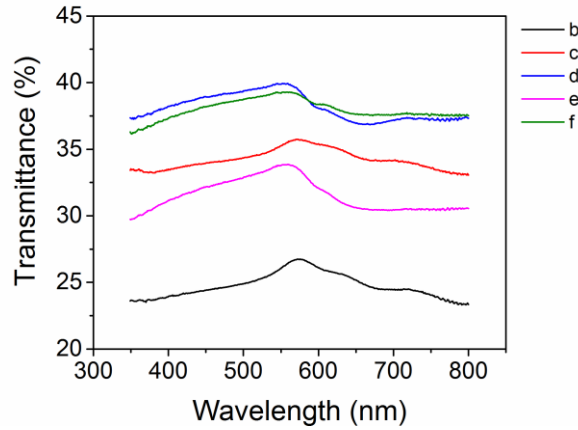

**Figure SI-6** UV-VIS spectra of PdCu grid patterns on PET (a) without plasma treatment, and after plasma treatment treatment: (b) 0 day, (c) 1 day, (d) 7 days. Printing 7 days after plasma treatment with copper plating 1 day after (e), and 2 days after printing (f). Scale bar 200  $\mu\text{m}$ .

**Table SI-1** Viscosity and density data for silver and palladium ink.

|            | Viscosity (mPa×s) | Density (g/cm <sup>3</sup> ) |
|------------|-------------------|------------------------------|
| Silver ink | 3.08              | 1.02                         |
| Pd ink     | 3.4               | 1.05                         |

**Table SI-2** The mean diameter size of the droplets for PdCu pattern printed and copper plated on different days after plasma treatment.

| Printing (days) | Cu Plating (days)                              |                |                |                |                |
|-----------------|------------------------------------------------|----------------|----------------|----------------|----------------|
|                 | No plasma                                      | 0              | 1              | 2              | 6              |
|                 | Mean diameter ( $\mu\text{m}$ ) $\pm$ st. dev. |                |                |                |                |
| No plasma       | 18.7 $\pm$ 1.0                                 |                |                |                |                |
| 0               |                                                | 92.0 $\pm$ 5.0 | 85.3 $\pm$ 1.5 | 86.1 $\pm$ 1.4 |                |
| 1               |                                                | 82.1 $\pm$ 2.3 |                | 82.1 $\pm$ 1.2 | 82.6 $\pm$ 1.4 |
| 2               |                                                | 89.3 $\pm$ 2.4 |                |                |                |
| 7               |                                                | 62.2 $\pm$ 2.8 | 68.0 $\pm$ 4.4 | 68.3 $\pm$ 4.5 |                |

**Table SI-3** The mean diameter size of the droplets for AgCu pattern printed and copper plated on different days after plasma treatment.

| Printing (days) | Cu Plating (days)                              |                |                |                |
|-----------------|------------------------------------------------|----------------|----------------|----------------|
|                 | No plasma                                      | 0              | 1              | 2              |
|                 | Mean diameter ( $\mu\text{m}$ ) $\pm$ st. dev. |                |                |                |
| No plasma       | 56.3 $\pm$ 5.6<br>no ring formation            |                |                |                |
| 0               |                                                |                |                |                |
| 1               |                                                | 80.7 $\pm$ 2.9 |                |                |
| 2               |                                                | 72.2 $\pm$ 2.3 |                |                |
| 7               |                                                | 72.2 $\pm$ 3.9 | 74.1 $\pm$ 2.5 | 74.5 $\pm$ 2.3 |



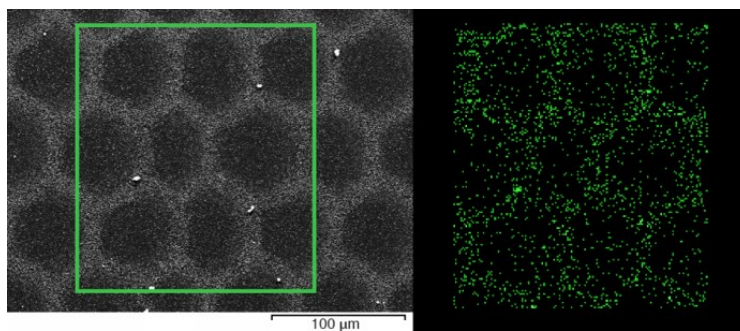

**Figure SI-7.** EDX AgCu pattern, showing the presence of copper also inside the areas surrounded by the ring shape patterns.

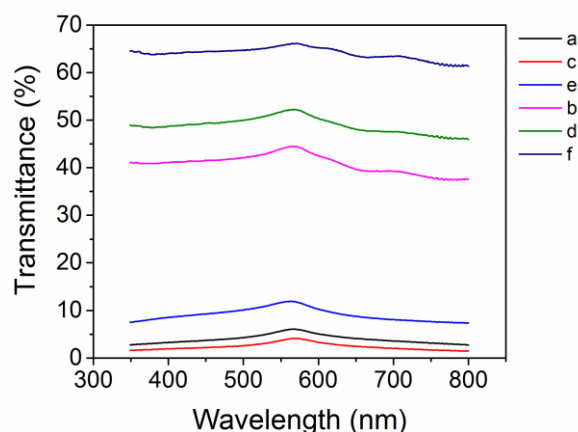

**Figure SI-8.** Optical transmittance of control samples (a, c, e) and samples etched by using  $\text{Na}_2\text{S}_2\text{O}_8$  (5 g/L) for 20 s (b), 40 s (d), and 60 s (f).

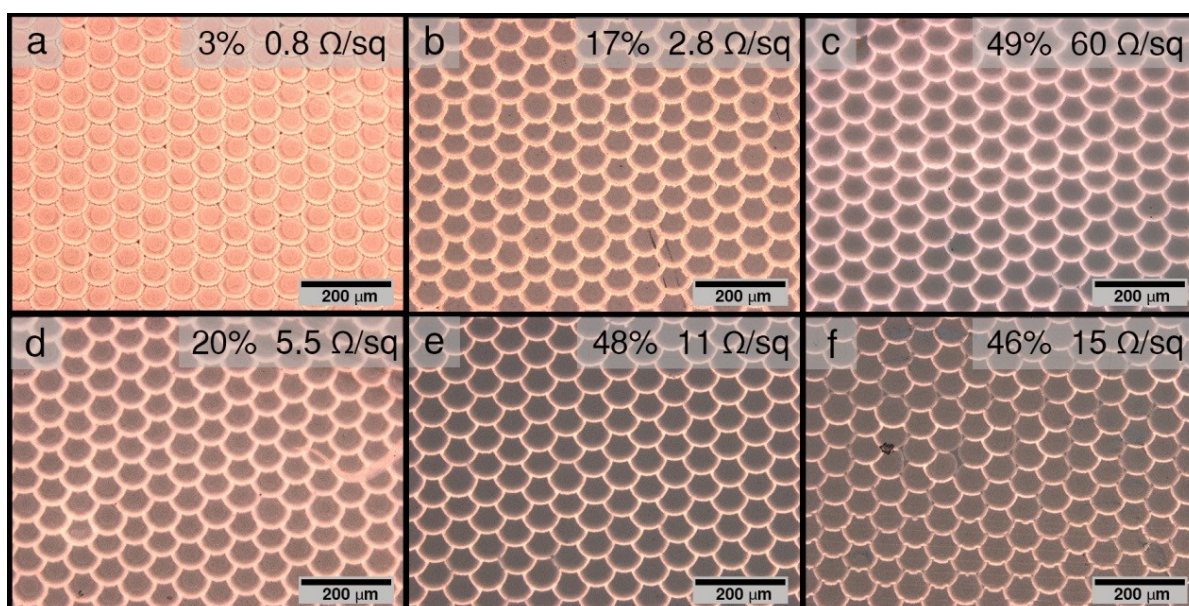

**Figure SI-9** PET substrates with the inkjet printed silver seeds were immersed into different liquid phase chemicals before copper plating in order to remove residual material from the inner parts of the coffee-rings. Most of the general solvents — water, acetone, isopropanol, etc. — seemed to improve the performance of the AgCu electrodes, however, none exceeded 50% of optical transmittance. Control sample (a) and samples washed after printing using hot water (b), soapy water (c), ethanol (d), 2-propanol (e), and acetone (f).

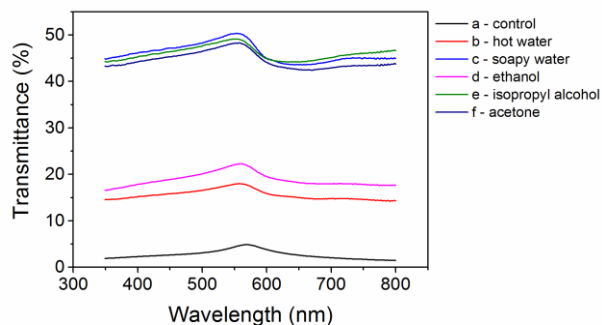

**Figure SI-10** UV-VIS spectra of control sample (a) and samples washed after printing using hot water (b), soapy water (c), ethanol (d), 2-propanol (e), and acetone (f).

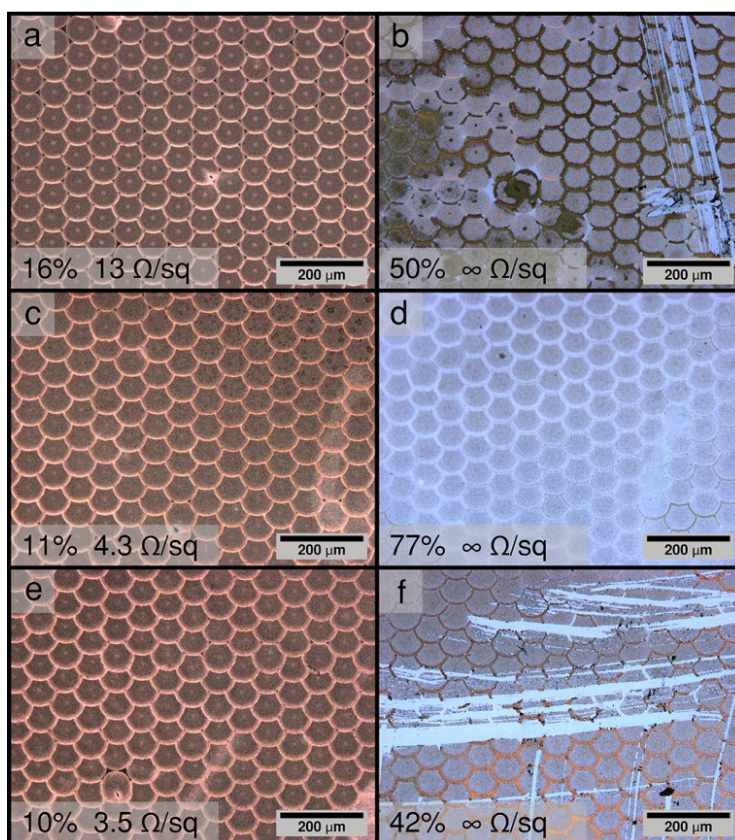

**Figure SI-11** Nitric acid treatment removed the undesirable copper coating in a homogeneous manner leading to uncondusive structures. Control sample (a, c, e) and samples etched by using HNO<sub>3</sub> (25 mL/L) for 20 s (b), 40 s (d), and 60 s (f).

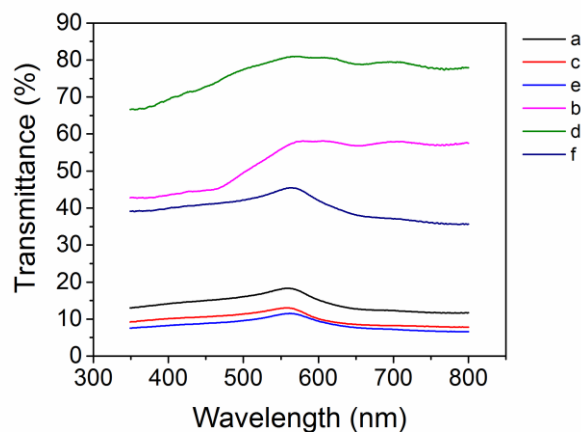

**Figure SI-12** UV-VIS spectra of control samples (a, c, e) and samples etched by using HNO<sub>3</sub> (25 mL/L) for 20 s (b), 40 s (d), and 60 s (f).

**Table SI-4** Sheet resistance values before and after scotch tape test, demonstrating the excellent adhesion of the metal electrodes to the PET substrate.

| Number of scotch tape test | PdCu pattern                                  | AgCu pattern                                  |
|----------------------------|-----------------------------------------------|-----------------------------------------------|
|                            | Mean Rs ( $\Omega/\text{sq}$ ) $\pm$ st. dev. | Mean Rs ( $\Omega/\text{sq}$ ) $\pm$ st. dev. |
| 0                          | 3.5 $\pm$ 0.03                                | 3.0 $\pm$ 0.06                                |
| 10                         | 3.8 $\pm$ 0.02                                | 3.0 $\pm$ 0.05                                |
| 50                         | 4.1 $\pm$ 0.08                                | 3.0 $\pm$ 0.05                                |
| 100                        | 6.4 $\pm$ 0.08                                | 3.1 $\pm$ 0.02                                |

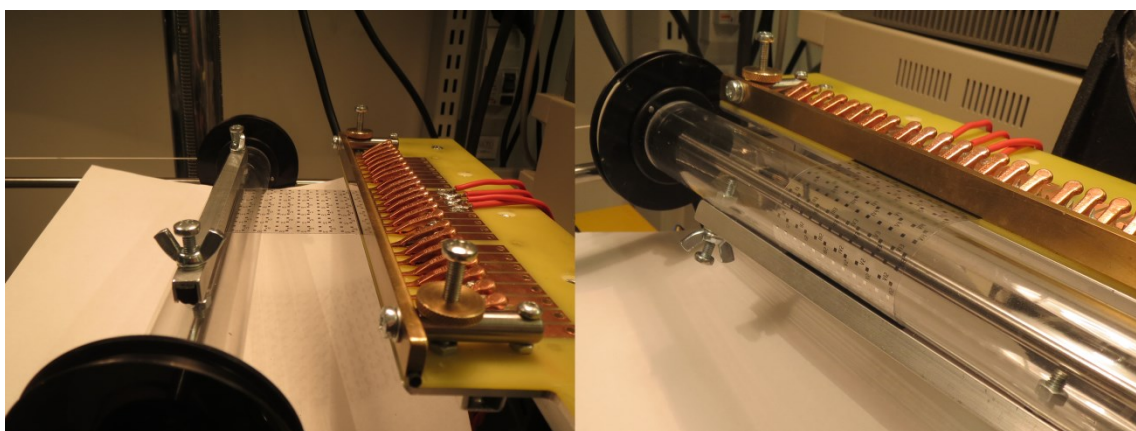

**Figure SI-13** Lab-made device for bending test.



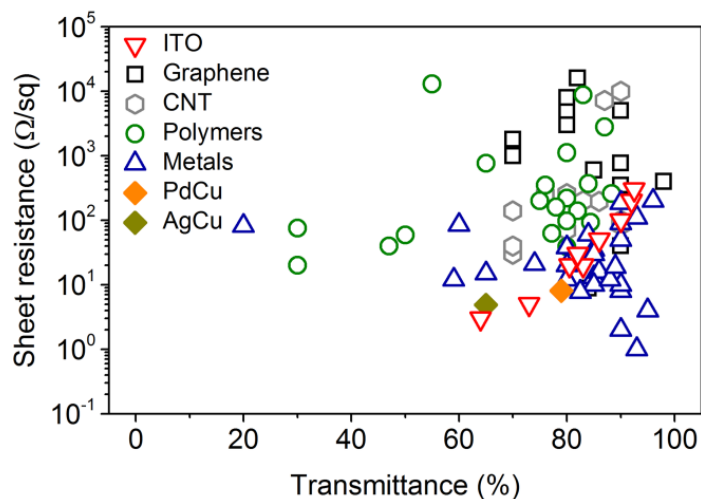

**Figure SI-14** Optical transmittance vs. sheet resistance for transparent conductive films based on various structures. Data source: papers listed in Table SI-5-8. Rs and T values of ITO are from J.-Y. Lee, Nano Lett. 2008, 8, 689.

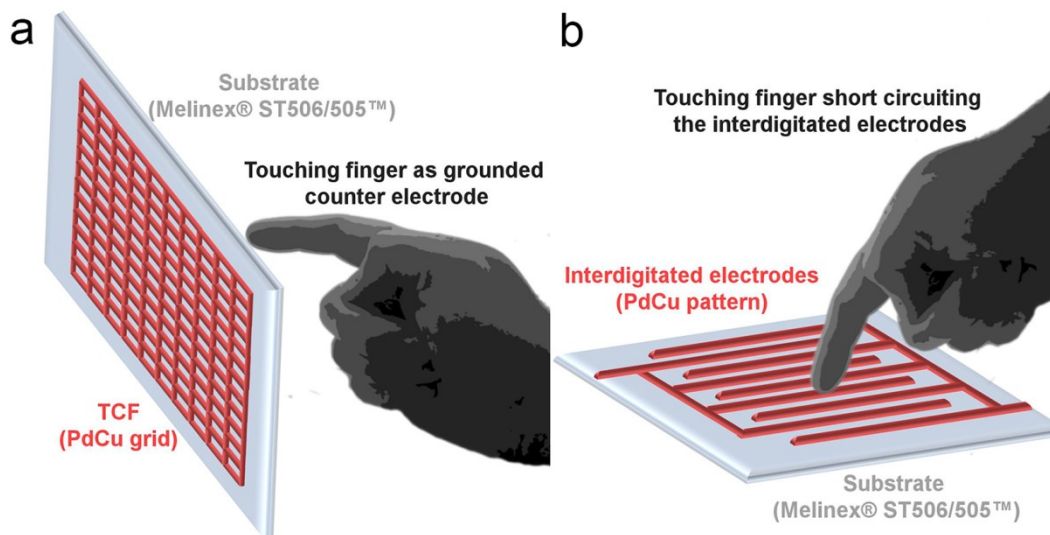

**Figure SI-15** Structure schematics of capacitive touch screen (a) and microscopic resistive touch pixel (b).

**Table SI-5** Comparison of sheet resistances and optical transmittance of metal or metal nanostructures based transparent conductive films.

| Reference                                  | Material/synthesis                       | Process                                   | Rs ( $\Omega/\text{sq}$ )     | T (%)                        | $\lambda$ (nm) |
|--------------------------------------------|------------------------------------------|-------------------------------------------|-------------------------------|------------------------------|----------------|
| Ag ACS Nano, 2009, 3, 3537.                | Ag NP grids                              | Ink-jet printing, ring-stains             | <b>4 <math>\pm</math> 0,5</b> | <b>95 <math>\pm</math> 3</b> | 400-800        |
| Ag ACS Nano, 2010, 4, 2955.                | Ag NWs 50-100 nm width                   | Mayer rod process                         | <b>110-12</b>                 | <b>~93-59</b>                | 500            |
| Ag ACS Nano, 2010, 4, 2955.                | Ag NWs 30-50 nm width                    | Mayer rod process                         | <b>20</b>                     | <b>~80</b>                   | 500            |
| Ag ACS Nano, 2009, 3, 1767.                | Ag NWs 85 nm (6.5 $\mu\text{m}$ length)  | Vacuum filtration                         | <b>13</b>                     | <b>85</b>                    | 550            |
| Ag Nano Lett., 2008, 8, 689.               | Ag NWs PVP, ~100 nm (8.7 $\mu\text{m}$ ) | Drop casting                              | <b>16</b>                     | <b>86</b>                    | 400-800        |
| Ag Nano Res., 2010, 3, 564.                | Ag NWs                                   | Dry transfer printing                     | <b>10</b>                     | <b>85</b>                    | 550            |
| Ag Sol. Energ. Mat. Sol. C, 2011, 95, 1339 | Ag grids                                 | Screen printing                           | <b>1</b>                      | <b>~92-94</b>                |                |
| Ag Organic Electronics, 2011, 12, 566      | Ag grids                                 | Screen printing                           | <b>0.5-15</b>                 | <b>~68-97</b>                |                |
| AuAg Nano Lett., 2009, 9, 4246.            | AuAg NWs                                 | Co-red. NWs mesh                          | <b>60</b>                     | <b>85</b>                    | 400-800        |
| Au Langmuir, 2011, 27, 2080.               | Au NPs 10 nm                             | Drop casting on mesh surface              | <b>20</b>                     | <b>82</b>                    | 400-800        |
| Cu Nano Lett., 2010, 10, 4242              | Cu NWs 50-200nm                          | Electrospinning                           | <b>96-80</b>                  | <b>200-12</b>                | 300-1100       |
| Cu JACS, 2012, 134, 14283                  | Cu NWs                                   | vacuum filtration                         | <b>90-85</b>                  | <b>90-35</b>                 |                |
| Cu Adv. Mater. 2011, 23, 4798              | Cu NWs                                   | Meyer rod                                 | <b>85-90</b>                  | <b>30-186</b>                | 550            |
| Cu Adv. Mater. 2010, 22, 3558              | Cu NWs                                   | Filtration, printing                      | <b>65</b>                     | <b>15</b>                    | 500            |
| CuNi Nano Lett. 2012, 12, 3193             | CuNi NWs                                 |                                           | <b>84</b>                     | <b>60</b>                    | 550            |
| Cu Nat. Nanotech. 2013, 8, 421             | metal nanotrough                         | Electrospinning and metal deposition      | <b>2</b>                      | <b>90</b>                    | 300-2000       |
| Au Nat. Nanotech. 2013, 8, 421             | metal nanotrough                         | Electrospinning and metal deposition      | <b>8</b>                      | <b>90</b>                    | 300-2000       |
| Ag Nat. Nanotech. 2013, 8, 421             | metal nanotrough                         | Electrospinning and metal deposition      | <b>10</b>                     | <b>90</b>                    | 300-2000       |
| Ag NPG Asia Mater. 2014, 6, e93            | nanowires                                | Filtration onto cellulose nanofiber paper | <b>12</b>                     | <b>88</b>                    | 550            |
| Cu NPG Asia Mater. 2014, 6, e105           | nanowires                                | Lactic acid treated, filtration           | <b>19</b>                     | <b>89</b>                    | 550            |

**Table SI-6** Comparison of sheet resistances and optical transmittance of graphene based transparent conductive films.

| Reference                            | Material/synthesis               | Process                | Rs ( $\Omega/\text{sq}$ ) | T (%)          | $\lambda$ (nm) |
|--------------------------------------|----------------------------------|------------------------|---------------------------|----------------|----------------|
| Nano Lett., 2008, 8, 323.            | Ox/Red                           | Dip coating            | <b>1800</b>               | <b>&gt; 70</b> | 500-550        |
| Appl. Phys. Lett., 2008, 92, 263302. | Ox/Red                           | Spin coating           | <b>5000</b>               | <b>&gt; 80</b> | 500-550        |
| Nat. Nanotechnol., 2008, 3, 538.     | Exfoliating                      | Langmuir, -Blodgett    | <b>8000</b>               | <b>80</b>      | 500-550        |
| Nano Lett., 2008, 8, 1704.           | Exfoliating                      | Spray deposition       | <b>5000</b>               | <b>90</b>      | 500-550        |
| Nano Lett., 2008, 8, 1704.           | Microcleavage                    | Transfer               | <b>400</b>                | <b>98</b>      | 500-550        |
| Small, 2010, 6, 58.                  | Exfoliating                      | Filtration/ transfer   | <b>3000</b>               | <b>80</b>      | 500-550        |
| ACS Nano, 2010, 4, 524.              | Ox/Red                           | Spin coating/ transfer | <b>1000</b>               | <b>70</b>      | 500-550        |
| Nano Lett., 2009, 9, 30.             | CVD Ni                           | Etching/transfer       | <b>770</b>                | <b>90</b>      | 500-550        |
| Carbon, 2010, 48, 1088.              | CVD Ni                           | Etching/transfer       | <b>600</b>                | <b>85</b>      | 500-550        |
| Nature, 2009, 457, 706.              | CVD Ni                           | Etching/transfer       | <b>280</b>                | <b>90</b>      | 500-550        |
| Nano Lett., 2009, 9, 4359.           | CVD Cu                           | Etching/transfer       | <b>350</b>                | <b>90</b>      | 500-550        |
| arxiv.org/pdf/0912.5485              | CVD Cu                           | Etching/transfer       | <b>40</b>                 | <b>90</b>      | 500-550        |
| Adv. Mater. 2012, 24, 2844           | Intercalated few-layer graphene  |                        | <b>8.8</b>                | <b>84</b>      | 550            |
| Sci. Reports 2014, 4, 4363           | Hydrothermal treatment of MWCNTs | Filtration/transfer    | <b>16000</b>              | <b>82</b>      | -              |



**Table SI-7** Comparison of sheet resistances and optical transmittance of CNT based transparent conductive films.

| Reference                                              | Material/synthesis        | Process                                         | Rs ( $\Omega/\text{sq}$ ) | T (%) | $\lambda$ (nm) |
|--------------------------------------------------------|---------------------------|-------------------------------------------------|---------------------------|-------|----------------|
| Science, 2004, 305, 1273.                              | Pulsed laser vaporization | Filtration/ transfer                            | 30                        | > 70  | 500-550        |
| Nano Lett., 2006, 6, 1880.                             | HiPCO                     | Filtration/ transfer                            | 7200                      | 87    | 500-550        |
|                                                        | Arc discharge             | SOCl <sub>2</sub> doping                        | 380                       |       | 500-550        |
| J. Am. Chem. Soc., 2007, 129, 7758.                    | Arc discharge             | Spry coating/ HNO <sub>3</sub> doping           | 40                        | 70    | 500-550        |
|                                                        |                           |                                                 | 70                        | 80    | 500-550        |
| Phys. Status Solidi RRL, 2007, 1, 178.                 | HiPCO                     | Dip coating                                     | 196                       | 86    | 500-550        |
| Nano Lett., 2008, 8, 1417.                             | HiPCO                     | Filtration/ transfer                            | 140                       | > 70  | 500-550        |
|                                                        | Laser-ablation            |                                                 |                           |       | 500-550        |
|                                                        | Arc discharge             |                                                 |                           |       | 500-550        |
|                                                        | Sorting metallic SWCNTs   |                                                 |                           |       | 500-550        |
| Adv. Funct. Mater., 2008, 18, 2548.                    | Arc discharge             | Filtration/ transfer                            | 170                       | 80    | 500-550        |
|                                                        |                           | Doping (SOCl <sub>2</sub> or HNO <sub>3</sub> ) | 140                       |       | 500-550        |
| Chem. Soc. Rev., 2010, 39, 2477.                       | CVD                       | Spray coating                                   | 259                       | 80    | 500-550        |
|                                                        |                           | with densification                              | 150                       |       | 500-550        |
| ACS Nano, 2011, 5, 3214.                               | Ferrocene vapor in CO gas | Filtration and dry transfer                     | 84                        | 90    | 550            |
| Phys. Status. Solidi B 2007, 244.4336                  | SWCNTs/PEDOT:PSS          | Inkjet printing                                 | 10000                     | 90    | 400            |
| ACS Nano 2012, 6 9737                                  | SWNTs/DWNTs               | Dip-coating                                     | 100                       | 90    | 550            |
| Mater. Res. Soc. Symp. Proc., 1537, mrss13-1537-b06-51 | SWCNTs                    |                                                 | 250                       | 76    | 550            |
| Jpn. J. Appl. Phys., 2014, 53, 05FD04                  | SWCNTs                    | Spray-coated                                    | 200                       | 83    | 550            |

**Table SI-8** Comparison of sheet resistances and optical transmittance of polymer based transparent conductive films.

| Reference                               | Material/synthesis              | Process                            | Rs ( $\Omega/\text{sq}$ ) | T (%)     | $\lambda$ (nm) |
|-----------------------------------------|---------------------------------|------------------------------------|---------------------------|-----------|----------------|
| Org. Electron., 2009, 10, 1401.         | PEDOT:PSS                       | Spin coating (different thickness) | 2800-160                  | 87-78     | 400-800        |
| Sol. Energ. Mat. Sol. C, 2006, 90, 123. | PEDOT                           | Silk screen printing               | 20-59                     | 30-50     | 500            |
| Adv. Funct. Mater., 2004, 14, 615.      | PEDOT                           | Spin coating and polymerization    | 140                       | 82        | 400-700        |
| Org. Electron., 2008, 9, 968.           | PEDOT                           | Spin coating and polymerization    | 761-76                    | 65-30     | 510            |
| Appl. Phys. Lett., 2008, 92, 233308.    | PH500 (PEDOT:PSS)               | Spin coating                       | 200                       | 75        | 400-800        |
| J.Mater. Chem., 2009, 19, 9045.         | PEDOT:PSS                       | Spin-coating                       | 63-258                    | 77.2-88.3 | 400-800        |
| Synthetic Met.,2011, 161, 1878          | PEDOT:PSS                       | Spin coating                       | 13000                     | 55        | 400-700        |
| Synthetic Met.,2011, 161, 1878          | PEDOT:PSS DMSO doping           | Spin coating                       | 40                        | 47        | 400-700        |
| Synthetic Met.,2011, 161, 1878          | PEDOT:PSS/PVP                   |                                    | 350-8830                  | 76-83     | 400-700        |
| Adv. Mater., 2012, 24, 2436             | PEDOT:PSS                       | Spin coating                       | 39                        | 80        | 550            |
| Adv. Funct. Mater. 2013, 23, 3763       | PEDOT:PSS                       | Spin coating                       | 93                        | 84.4      | 550            |
| Energy Environ. Sci., 2013, 6, 1956     | PEDOT:PSS/glycerol monostearate | Spin coating                       | 98                        | 80        | 550            |

**Table SI-9** Parameters for both Pd reactive inkjet printing.

| Parameters                                                                        | Final                                                                             | Other parameters tested                                                            |
|-----------------------------------------------------------------------------------|-----------------------------------------------------------------------------------|------------------------------------------------------------------------------------|
| <b>Pattern sequence</b>                                                           | 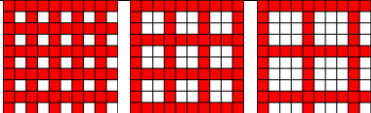 |  |
|  |                                                                                   |                                                                                    |
| <b>Cartridge height (mm)</b>                                                      | 0.25                                                                              | 0.5; 0.75; 1.00                                                                    |
| <b>Cartridge temperature (°C)</b>                                                 | 30                                                                                | -                                                                                  |
| <b>Substrate</b>                                                                  | Melinex (ST506/505)                                                               | -                                                                                  |
| <b>Substrate thickness</b>                                                        | 125 μm                                                                            | -                                                                                  |
| <b>Substrate temperature (°C)</b>                                                 | 40                                                                                | 25; 30; 45; 60                                                                     |
| <b>Firing voltage (V)</b>                                                         | 10-16 V                                                                           | -                                                                                  |
| <b>Meniscus</b>                                                                   | 0                                                                                 | -                                                                                  |
| <b>Jet numbers</b>                                                                | 1                                                                                 | -                                                                                  |
| <b>Drop spacing (μm)</b>                                                          | 20, 25, 30, 100                                                                   | -                                                                                  |
| <b>Layers</b>                                                                     | 1                                                                                 | 1-10                                                                               |

**Table SI-10** Parameters for Ag reactive inkjet printing.

| Parameters                                                                        | Final                                                                             | Other parameters tested                                                            |
|-----------------------------------------------------------------------------------|-----------------------------------------------------------------------------------|------------------------------------------------------------------------------------|
| <b>Pattern sequence</b>                                                           | 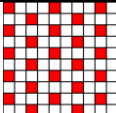 |  |
|  |                                                                                   |                                                                                    |
| <b>Cartridge height (mm)</b>                                                      | 0.25                                                                              | 0.50                                                                               |
| <b>Cartridge temperature (°C)</b>                                                 | 30                                                                                | 40                                                                                 |
| <b>Substrate</b>                                                                  | Melinex (ST506/505)                                                               | -                                                                                  |
| <b>Substrate thickness</b>                                                        | 125                                                                               | -                                                                                  |
| <b>Substrate temperature (°C)</b>                                                 | 60                                                                                | 30; 40; 45; 50                                                                     |
| <b>Firing voltage (V)</b>                                                         | 8-14                                                                              | 8-30                                                                               |
| <b>Meniscus</b>                                                                   | 2                                                                                 | 0;1                                                                                |
| <b>Jet numbers</b>                                                                | 1                                                                                 | -                                                                                  |
| <b>Drop spacing (μm)</b>                                                          | 30                                                                                | 25; 100                                                                            |
| <b>Layers</b>                                                                     | 1                                                                                 | -                                                                                  |

**Video SI-1** Video of bending test.

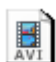

Video SI-1.avi

**Video SI-2** Video of capacitive screen test.

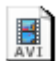

Video SI-2.avi

**Video SI-3** Video of resistive touch pixel test.

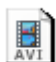

Video SI-3.avi
